# Supplementary material
Source: publisher figshare collection journal article supplement (https://tandf.figshare.com/ndownloader/files/15017141)
Supplement: Supplementary file 1 [file 15017141]

**SUPPORTING MATERIALS**

**Table S1.** The pH, UV-254, and SUVA of raw water (RW), river water, domestic wastewater (WW), and treated wastewater (TWW) for the three sampling times.

|  |  | BK WTP |  | SB WTP |  | River |  | AT | |  | AY | |
| --- | --- | --- | --- | --- | --- | --- | --- | --- | --- | --- | --- | --- |
| Parameter |  | RW-1 |  | RW-2 |  | At downstream |  | WW**-**1 | TWW**-**1 |  | WW-2 | TWW-2 |
| pH | 1st | 7.8 |  | 7.9 |  | 7.6 |  | 8.2 | 7.9 |  | 7.7 | 7.8 |
|  | 2nd | 7.5 |  | 7.0 |  | 7.2 |  | 7.4 | 7.8 |  | 7.3 | 7.4 |
|  | 3rd | 7.3 |  | 7.1 |  | 7.0 |  | 7.0 | 8.0 |  | 7.0 | 7.1 |
|  | Ave.± SD | 7.5±0.3 |  | 7.3±0.5 |  | 7.3±0.3 |  | 7.5±0.6 | 7.9±0.1 |  | 7.3±0.4 | 7.4±0.4 |
| UV-254 | 1st | 0.14 |  | 0.16 |  | 0.19 |  | 0.93 | 0.12 |  | 0.34 | 0.10 |
| (cm-1) | 2nd | 0.13 |  | 0.14 |  | 0.11 |  | 0.12 | 0.13 |  | 0.19 | 0.17 |
|  | 3rd | 0.12 |  | 0.09 |  | 0.15 |  | 0.07 | 0.16 |  | 0.18 | 0.12 |
|  | Ave.± SD | 0.13±0.01 |  | 0.13±0.04 |  | 0.15±0.04 |  | 0.37±0.48 | 0.14±0.02 |  | 0.24±0.09 | 0.13±0.04 |
| SUVA | 1st | 3.0 |  | 3.3 |  | 3.7 |  | 12.7 | 2.3 |  | 4.6 | 1.8 |
| (L/mg⋅m) | 2nd | 4.1 |  | 3.5 |  | 2.7 |  | 2.2 | 2.0 |  | 2.7 | 2.7 |
|  | 3rd | 3.2 |  | 3.9 |  | 2.9 |  | 2.4 | 2.3 |  | 2.3 | 2.6 |
|  | Ave.± SD | 3.4±0.6 |  | 3.6±0.3 |  | 3.1±0.5 |  | 5.8±6.0 | 2.2±0.2 |  | 3.2±1.2 | 2.4±0.5 |

Remark: BK WTP = Bangkhen Water Treatment Plant, SB WTP = Sing Buri Water Treatment Plant, AT = Ang Thong, AY = Ayutthaya

**Table S2.** DBPFP of raw water (RW), river water, domestic wastewater (WW), and treated wastewater (TWW) for the three sampling times.

| Samples | THMFP (µg/L) | | | | I-THMFP (µg/L) | | | | HANFP (µg/L) | | | | TCNMFP (µg/L) | | | |
| --- | --- | --- | --- | --- | --- | --- | --- | --- | --- | --- | --- | --- | --- | --- | --- | --- |
| 1st | 2nd | 3rd | Ave.± SD | 1st | 2nd | 3rd | Ave.± SD | 1st | 2nd | 3rd | Ave.± SD | 1st | 2nd | 3rd | Ave.± SD |
| Raw water |  |  |  |  |  |  |  |  |  |  |  |  |  |  |  |  |
| RW-1 | 265 | 121 | 154 | 180±75 | 7 | 1 | 1 | 3±3.2 | 21 | 9 | 9 | 13±7 | 3 | 2 | 2 | 2±0.5 |
| RW-2 | 205 | 210 | 103 | 173±60 | 1 | 16 | 2 | 6±8.6 | 18 | 30 | 40 | 29±11 | N.D. | 6 | 3 | 3±2.9 |
| River water | 249 | 204 | 449 | 300±130 | 1 | 0.4 | 1 | 1±0.3 | 18 | 10 | 8 | 12±5 | 3 | 2 | 1 | 2±1.2 |
| Wastewater |  |  |  |  |  |  |  |  |  |  |  |  |  |  |  |  |
| WW-1 | 407 | 463 | 220 | 363±127 | 6 | 52 | 8 | 22±26 | 20 | 18 | 14 | 17±3 | 9 | 17 | 4 | 10±6.6 |
| WW-2 | 430 | 390 | 536 | 452±75 | 6 | 5 | 47 | 19±24 | 14 | 40 | 30 | 28±13 | 24 | 23 | 13 | 20±6.2 |
| Treated wastewater | | |  |  |  |  |  |  |  |  |  |  |  |  |  |  |
| TWW-1 | 373 | 379 | 472 | 408±56 | 5 | 8 | 46 | 20±23 | 17 | 45a | 38 | 33±15 | 18 | 36 | 26 | 27±8.8 |
| TWW-2 | 267 | 633 | 381 | 427±187 | 9 | 48 | N.D. | 19±26 | 25 | 26 | 47 | 33±12 | 21 | 27 | 6 | 18±10.9 |

N.D. is not detected

**Table S3.** Percent distribution of THMFP, I−THMFP, and HANFP species of raw water, river water, domestic wastewater and treated wastewater

| Water sources |  | 4-THMFP, % | | | |  | 5-ITHMFP, % | | | | |  | 4-HANFP, % | | | |
| --- | --- | --- | --- | --- | --- | --- | --- | --- | --- | --- | --- | --- | --- | --- | --- | --- |
|  |  | Chloroform | BDCM | DBCM | Bromoform |  | BCIM | CDIM | DCIM | BDIM | TIM |  | TCAN | DCAN | BCAN | DBAN | |
| **Raw water** |  |  |  |  |  |  |  |  |  |  |  |  |  |  |  |  | |
| RW-1 | 1st | 94.1 | 5.7 | 0.2 | N.D. |  | N.D. | 12.3 | 87.7 | N.D. | N.D. |  | 17.5 | 67.0 | 15.5 | N.D. | |
| (BK WTP) | 2nd | 87.4 | 11.5 | 1.1 | N.D. |  | N.D. | N.D. | 100 | N.D. | N.D. |  | 18.7 | 57.1 | 24.2 | N.D. | |
|  | 3rd | 73.9 | 20.7 | 5.2 | 0.1 |  | N.D. | 91.7 | 8.3 | N.D. | N.D. |  | 17.6 | 64.7 | N.D. | 17.6 | |
|  | Avg. | 85.1 | 12.7 | 2.2 | 0.03 |  | N.D. | 34.7 | 65.3 | N.D. | N.D. |  | 17.9 | 62.9 | 13.2 | 5.9 | |
| RW-2 | 1st | 96.0 | 3.9 | 0.1 | N.D. |  | N.D. | 100 | N.D. | N.D. | N.D. |  | 11.0 | 73.5 | 15.5 | N.D. | |
| (SB WTP) | 2nd | 95.6 | 4.3 | 0.1 | N.D. |  | 48.4 | 4.3 | 47.2 | N.D. | N.D. |  | 11.4 | 76.3 | 12.4 | N.D. | |
|  | 3rd | 90.9 | 8.7 | 0.4 | N.D. |  | 22.7 | N.D. | 77.3 | N.D. | N.D. |  | 5.2 | 46.4 | 36.9 | 11.5 | |
|  | Avg. | 94.2 | 5.6 | 0.2 | N.D. |  | 23.7 | 34.8 | 41.5 | N.D. | N.D. |  | 9.2 | 65.4 | 21.6 | 3.8 | |
| **River water at downstream** | | | |  |  |  |  |  |  |  |  |  |  |  |  |  | |
|  | 1st | 94.5 | 5.2 | 0.2 | N.D. |  | N.D. | 100 | N.D. | N.D. | N.D. |  | 11.4 | 71.0 | 17.6 | N.D. | |
|  | 2nd | 73.2 | 21.6 | 5.2 | N.D. |  | N.D. | 100 | N.D. | N.D. | N.D. |  | 10.6 | 52.9 | 26.9 | 9.6 | |
|  | 3rd | 77.8 | 17.8 | 4.2 | 0.1 |  | N.D. | 100 | N.D. | N.D. | N.D. |  | 26.6 | 51.9 | 21.5 | N.D. | |
|  | Avg. | 81.8 | 14.9 | 3.2 | N.D. |  | N.D. | 100 | N.D. | N.D. | N.D. |  | 16.2 | 58.6 | 22.0 | 3.2 | |
| **Domestic wastewater** | | |  |  |  |  |  |  |  |  |  |  |  |  |  |  | |
| WW-1 | 1st | 91.1 | 8.4 | 0.5 | N.D. |  | N.D. | 55.4 | 44.6 | N.D. | N.D. |  | 10.0 | 35.3 | 32.3 | 22.4 | |
| (AT) | 2nd | 95.7 | 4.1 | 0.2 | N.D. |  | N.D. | 7.4 | 6.0 | N.D. | 86.7 |  | 16.4 | 75.4 | 8.2 | N.D. | |
|  | 3rd | 81.1 | 15.0 | 3.9 | N.D. |  | N.D. | 41.6 | N.D. | 58.4 | N.D. |  | 10.3 | 43.4 | 29.4 | 16.9 | |
|  | Avg. | 89.3 | 9.2 | 1.5 | N.D. |  | N.D. | 34.8 | 16.9 | 19.5 | 28.9 |  | 12.2 | 51.4 | 23.3 | 13.1 | |
| WW-2 | 1st | 87.7 | 10.7 | 1.2 | 0.4 |  | N.D. | 39.3 | 60.7 | N.D. | N.D. |  | 24.3 | 54.9 | 20.8 | N.D. | |
| (AY) | 2nd | 84.3 | 13.6 | 2.1 | N.D. |  | N.D. | 34.0 | 66.0 | N.D. | N.D. |  | 40.7 | 47.4 | 11.9 | N.D. | |
|  | 3rd | 97.8 | 2.1 | 0.1 | N.D. |  | N.D. | 4.5 | 16.7 | 10.9 | 67.8 |  | 3.0 | 83.5 | 13.5 | N.D. | |
|  | Avg. | 90.0 | 8.8 | 1.1 | 0.1 |  | N.D. | 26.0 | 47.8 | 3.6 | 22.6 |  | 22.7 | 61.9 | 15.4 | N.D. | |

**Table S3. (Con’t)** Percent distribution of THMFP, I−THMFP, and HANFP species of raw water, river water, domestic wastewater and treated wastewater.

| Water sources |  | 4-THMFP, % | | | |  | 5-ITHMFP, % | | | | |  | 4-HANFP, % | | | |
| --- | --- | --- | --- | --- | --- | --- | --- | --- | --- | --- | --- | --- | --- | --- | --- | --- |
|  |  | Chloroform | BDCM | DBCM | Bromoform |  | BCIM | CDIM | DCIM | BDIM | TIM |  | TCAN | DCAN | BCAN | DBAN |
| **Treated wastewater** | | |  |  |  |  |  |  |  |  |  |  |  |  |  |  |
| TWW-1 | 1st | 72.4 | 21.7 | 5.6 | 0.2 |  | N.D. | 38.8 | 61.2 | N.D. | N.D. |  | 15.0 | 38.3 | 29.3 | 17.4 |
| (AT) | 2nd | 63.8 | 24.5 | 10.9 | 0.7 |  | N.D. | 43.6 | N.D. | 56.4 | N.D. |  | 10.4 | 37.2 | 18.8 | 33.6 |
|  | 3rd | 76.9 | 18.0 | 4.8 | 0.3 |  | N.D. | 4.5 | N.D. | 13.6 | 81.8 |  | 11.1 | 62.1 | 13.9 | 12.9 |
|  | Avg. | 71.1 | 21.4 | 7.1 | 0.4 |  | N.D. | 29.0 | 20.4 | 23.3 | 27.3 |  | 12.1 | 45.9 | 20.7 | 21.3 |
| TWW-2 | 1st | 84.6 | 13.1 | 1.6 | 0.7 |  | N.D. | 27.7 | 19.1 | 53.2 | N.D. |  | 12.0 | 67.9 | 15.7 | 4.4 |
| (AY) | 2nd | 91.4 | 7.6 | 1.1 | N.D. |  | N.D. | 3.5 | N.D. | 11.2 | 85.2 |  | 13.3 | 74.9 | 11.8 | N.D. |
|  | 3rd | 55.6 | 29.1 | 14.1 | 1.1 |  | N.D. | N.D. | N.D. | N.D. | N.D. |  | 1.3 | 51.4 | 32.5 | 14.8 |
|  | Avg. | 77.2 | 16.6 | 5.6 | 0.6 |  | N.D. | 10.4 | 6.4 | 21.5 | 28.4 |  | 8.9 | 64.7 | 20.0 | 6.4 |

Remark: BK WTP = Bangkhen Water Treatment Plant, SB WTP = Sing Buri Water Treatment Plant, AT = Ang Thong, AY = Ayutthaya, Avg. = Average, N.D. is not detected

**Table S4.** Linear correlation coefficients (R2) between DBPFP and DOM surrogate parameters of raw water, domestic wastewater, and treated wastewater.

|  | Regression parameter | | | |  |  |  |  |
| --- | --- | --- | --- | --- | --- | --- | --- | --- |
| Water sources | Dependent  variables (y) | Independent variables (x) | Slope  (m) | Intercept  (C) | N | R2 | Sig. level | Correlation level |
| **Raw water** |  |  |  |  |  |  |  |  |
| DOC 2.4-4.8 mg C/L | THMFP | DOC | 60.8 | -54.6 | 6 | 0.8076 | 0.01 | Moderate |
| DON 0.12-0.44 mg N/L | THMFP | DON | - | - | 6 | 0.0798 | Not | Poor |
| DOC/DON 7-29 | THMFP | DOC/DON | - | - | 6 | 0.4309 | Not | Poor |
|  | I−THMFP | DOC | - | - | 6 | 0.0627 | Not | Poor |
|  | I−THMFP | DON | - | - | 6 | 0.0002 | Not | Poor |
|  | I−THMFP | DOC/DON | - | - | 6 | 0.0001 | Not | Poor |
|  | HANFP | DOC | - | - | 6 | 0.1172 | Not | Poor |
|  | HANFP | DON | - | - | 6 | 0.3616 | Not | Poor |
|  | HANFP | DOC/DON | - | - | 6 | 0.0870 | Not | Poor |
|  | HNMFP | DOC | - | - | 5 | 0.0528 | Not | Poor |
|  | HNMFP | DON | - | - | 5 | 0.0074 | Not | Poor |
|  | HNMFP | DOC/DON | - | - | 5 | 0.0017 | Not | Poor |
| **Wastewater** |  |  |  |  |  |  |  |  |
| DOC 3.0-7.9 mg C/L | THMFP | DOC | 48.1 | 101.4 | 6 | 0.6903 | 0.04 | Fair |
| DON 0.39-2.62 mg N/L | THMFP | DON | - | - | 6 | 0.0160 | Not | Poor |
| DOC/DON 3-19 | THMFP | DOC/DON | - | - | 6 | 0.1077 | Not | Poor |
|  | I−THMFP | DOC | - | - | 6 | 0.0103 | Not | Poor |
|  | I−THMFP | DON | - | - | 6 | 0.0098 | Not | Poor |
|  | I−THMFP | DOC/DON | - | - | 6 | 0.0010 | Not | Poor |
|  | HANFP | DOC | - | - | 6 | 0.2260 | Not | Poor |
|  | HANFP | DON | - | - | 6 | 0.0134 | Not | Poor |
|  | HANFP | DOC/DON | - | - | 6 | 0.0176 | Not | Poor |
|  | HNMFP | DOC | - | - | 6 | 0.3137 | Not | Poor |
|  | HNMFP | DON | - | - | 6 | 0.0317 | Not | Poor |
|  | HNMFP | DOC/DON | - | - | 6 | 0.2090 | Not | Poor |
| **Treated Wastewater** |  |  |  |  |  |  |  |  |
| DOC 4.8-7.0 mg C/L | THMFP | DOC | - | - | 6 | 0.1707 | Not | Poor |
| DON 0.20-2.58 mg N/L | THMFP | DON | - | - | 6 | 0.0357 | Not | Poor |
| DOC/DON 3-27 | THMFP | DOC/DON | - | - | 6 | 0.0002 | Not | Poor |
|  | I−THMFP | DOC | - | - | 5 | 0.2605 | Not | Poor |
|  | I−THMFP | DON | - | - | 5 | 0.0707 | Not | Poor |
|  | I−THMFP | DOC/DON | - | - | 5 | 0.0590 | Not | Poor |
|  | HANFP | DOC | - | - | 6 | 0.0448 | Not | Poor |
|  | HANFP | DON | - | - | 6 | 0.2293 | Not | Poor |
|  | HANFP | DOC/DON | - | - | 6 | 0.3216 | Not | Poor |
|  | HNMFP | DOC | 10.2 | -34.4 | 6 | 0.7901 | 0.01 | Moderate |
|  | HNMFP | DON | 9.0 | 13.2 | 6 | 0.6051 | 0.06 | Fair |
|  | HNMFP | DOC/DON | - | - | 6 | 0.0204 | Not | Poor |

Remark: Regression equation is y = mx+C; Regression analysis was not carried out for R2 < 0.5. Hence, slope (m) and intercept (C) for equation were not computed; DBPFP was dependent variable whereas DOC, DON and DOC/DON were independent variables; N = Sample size; Sig. = Significant

**Table S5.** Linear correlation coefficients (R2) between DBPFP species and the bromide ion (Br-) and iodide ion (I-) of raw water, domestic wastewater, and treated wastewater.

|  | Regression parameter | | | |  |  |  |  |
| --- | --- | --- | --- | --- | --- | --- | --- | --- |
| Water sources | Dependent  variables (y) | Independent variables (x) | Slope  (m) | Intercept  (C) | N | R2 | Sig. level | Correlation level |
| **Raw water** | **THMFP** |  |  |  |  |  |  |  |
| Br- 16-51 µg/L | (1) CHCl3FP | Br- | - | - | 5 | 0.2835 | Not | Poor |
|  | (2) CHBrCl2FP | Br- | -53.3 | 35.9 | 5 | 0.6200 | 0.11 | Fair |
|  | (3) CHBr2ClFP | Br- | -20.4 | 9.8 | 5 | 0.7343 | 0.06 | Moderate |
|  | (4) CHBr3FP | Br- | - | - | 1 | NA | NA | NA |
|  | Total (1)+(2)+(3) | Br- | - | - | 5 | 0.1608 | Not | Poor |
|  | **I−THMFP** |  |  |  |  |  |  |  |
|  | (1) CHBrClIFP | Br- | - | - | 1 | NA | NA | NA |
|  | (2) CHClI2FP | Br- | - | - | 4 | 0.3553 | Not | Poor |
|  | (3) CHCl2IFP | Br- | - | - | 4 | 0.0042 | Not | Poor |
|  | (4) CHBrI2FP | Br- | - | - | 0 | NA | NA | NA |
|  | (5) CHI3FP | Br- | - | - | 0 | NA | NA | NA |
|  | Total (1)+(2)+(3) | Br- | - | - | 5 | 0.0156 | Not | Poor |
|  | **HANFP** |  |  |  |  |  |  |  |
|  | (1) CCl3CNFP | Br- | - | - | 5 | 0.0923 | Not | Poor |
|  | (2) Cl2CHCNFP | Br- | - | - | 5 | 0.0366 | Not | Poor |
|  | (3) C2HBrClNFP | Br- | - | - | 4 | 0.4850 | Not | Poor |
|  | (4) C2HBr2NFP | Br- | - | - | 1 | NA | NA | NA |
|  | Total (1)+(2)+(3)+(4) | Br- | - | - | 5 | 0.0565 | Not | Poor |
| I- 3.2-16.9 µg/L | **I−THMFP** |  |  |  |  |  |  |  |
|  | (1) CHBrClIFP | I- | - | - | 1 | NA | NA | NA |
|  | (2) CHClI2FP | I- | -0.06 | 0.9 | 4 | 0.8303 | 0.03 | Moderate |
|  | (3) CHCl2IFP | I- | - | - | 4 | 0.0006 | Not | Poor |
|  | (4) CHBrI2FP | I- | - | - | 0 | NA | NA | NA |
|  | (5) CHI3FP | I- | - | - | 0 | NA | NA | NA |
|  | Total (1)+(2)+(3) | I- | - | - | 5 | 0.0014 | Not | Poor |
| **Wastewater** | **THMFP** |  |  |  |  |  |  |  |
| Br- 785-7,844 µg/L | (1) CHCl3FP | Br- | - | - | 6 | 0.0601 | Not | Poor |
|  | (2) CHBrCl2FP | Br- | - | - | 6 | 0.2377 | Not | Poor |
|  | (3) CHBr2ClFP | Br- | - | - | 6 | 0.0083 | Not | Poor |
|  | (4) CHBr3FP | Br- | - | - | 1 | NA | NA | NA |
|  | Total (1)+(2)+(3)+(4) | Br- | - | - | 6 | 0.0374 | Not | Poor |
|  | **I−THMFP** |  | - | - |  |  |  |  |
|  | (1) CHBrClIFP | Br- | - | - | 0 | NA | NA | NA |
|  | (2) CHClI2FP | Br- | - | - | 6 | 0.1882 | Not | Poor |
|  | (3) CHCl2IFP | Br- | - | - | 5 | 0.3404 | Not | Poor |
|  | (4) CHBrI2FP | Br- | - | - | 2 | NA | NA | NA |
|  | (5) CHI3FP | Br- | - | - | 2 | NA | NA | NA |
|  | Total (2)+(3)+(4)+(5) | Br- | - | - | 6 | 0.0882 | Not | Poor |

Remark: Regression equation is y = mx+C; Regression analysis was not carried out for R2 < 0.5. Hence, slope (m) and intercept (C) for equation were not computed; DBPFP was dependent variable whereas Br- and I- were independent variables; N = Sample size; Sig. = Significant; NA is not available

**Table S5. (cont.)** Linear correlation coefficients (R2) between DBPFP species and the bromide ion (Br-) and iodide ion (I-) of raw water, domestic wastewater, and treated wastewater.

|  | Regression parameter | | | |  |  |  |  |
| --- | --- | --- | --- | --- | --- | --- | --- | --- |
| Water sources | Dependent  variables (y) | Independent variables (x) | Slope  (m) | Intercept  (C) | N | R2 | Sig. level | Correlation level |
| **Wastewater** | **HANFP** |  |  |  |  |  |  |  |
|  | (1) CCl3CNFP | Br- | - | - | 6 | 0.0950 | Not | Poor |
|  | (2) Cl2CHCNFP | Br- | - | - | 6 | 0.2936 | Not | Poor |
|  | (3) C2HBrClNFP | Br- | - | - | 6 | 0.0028 | Not | Poor |
|  | (4) C2HBr2NFP | Br- | - | - | 2 | NA | NA | NA |
|  | Total (1)+(2)+(3)+(4) | Br- | - | - | 6 | 0.0354 | Not | Poor |
| I- 1.2-846 µg/L | **I−THMFP** |  |  |  |  |  |  |  |
|  | (1) CHBrClIFP | I- | - | - | 0 | NA | NA | NA |
|  | (2) CHClI2FP | I- | - | - | 6 | 0.0673 | Not | Poor |
|  | (3) CHCl2IFP | I- | - | - | 5 | 0.0346 | Not | Poor |
|  | (4) CHBrI2FP | I- | - | - | 2 | NA | NA | NA |
|  | (5) CHI3FP | I- | - | - | 2 | NA | NA | NA |
|  | Total (2)+(3)+(4)+(5) | I- | - | - | 6 | 0.0984 | Not | Poor |
| **Treated Wastewater** | **THMFP** |  |  |  |  |  |  |  |
| Br- 23-5,050 µg/L | (1) CHCl3FP | Br- | - | - | 4 | 0.3030 | Not | Poor |
|  | (2) CHBrCl2FP | Br- | - | - | 4 | 0.0052 | Not | Poor |
|  | (3) CHBr2ClFP | Br- | - | - | 4 | 0.0646 | Not | Poor |
|  | (4) CHBr3FP | Br- | - | - | 4 | 0.0007 | Not | Poor |
|  | Total (1)+(2)+(3)+(4) | Br- | - | - | 4 | 0.4005 | Not | Poor |
|  | **I−THMFP** |  |  |  |  |  |  |  |
|  | (1) CHBrClIFP | Br- | - | - | 0 | NA | NA | NA |
|  | (2) CHClI2FP | Br- | - | - | 4 | 0.0733 | Not | Poor |
|  | (3) CHCl2IFP | Br- | - | - | 2 | NA | NA | NA |
|  | (4) CHBrI2FP | Br- | -0.07 | 5.3 | 3 | 0.5392 | 0.26 | Fair |
|  | (5) CHI3FP | Br- | - | - | 1 | NA | NA | NA |
|  | Total (2)+(3)+(4)+(5) | Br- | - | - | 4 | 0.3868 | Not | Poor |
|  | **HANFP** |  |  |  |  |  |  |  |
|  | (1) CCl3CNFP | Br- | -0.03 | 4.1 | 4 | 0.6956 | 0.16 | Fair |
|  | (2) Cl2CHCNFP | Br- | -0.19 | 19.2 | 4 | 0.6562 | 0.19 | Fair |
|  | (3) C2HBrClNFP | Br- | - | - | 4 | 0.0650 | Not | Poor |
|  | (4) C2HBr2NFP | Br- | - | - | 3 | 0.1514 | Not | Poor |
|  | Total (1)+(2)+(3)+(4) | Br- | -0.4 | 36.2 | 4 | 0.5423 | 0.27 | Fair |
| I- 0.2-270 µg/L | **I−THMFP** |  |  |  |  |  |  |  |
|  | (1) CHBrClIFP | I- | - | - | 0 | NA | NA | NA |
|  | (2) CHClI2FP | I- | - | - | 5 | 0.0381 | Not | Poor |
|  | (3) CHCl2IFP | I- | - | - | 2 | NA | NA | NA |
|  | (4) CHBrI2FP | I- | - | - | 4 | 0.1166 | Not | Poor |
|  | (5) CHI3FP | I- | - | - | 2 | NA | NA | NA |
|  | Total (2)+(3)+(4)+(5) | I- | - | - | 5 | 0.1983 | Not | Poor |

Remark: Regression equation is y = mx+C; Regression analysis was not carried out for R2 < 0.5. Hence, slope (m) and intercept (C) for equation were not computed; DBPFP was dependent variable whereas Br- and I- were independent variables; N = Sample size; Sig. = Significant; NA is not available
